# Supplementary material for: Rational design of stapled peptides targeting phosphorylated GSK3β for regulating osteoclast differentiation
Source: Royal Society of Chemistry journal article supplement (doi:10.1039/d0ra00008f), 2020-01-01
Supplement: d0ra00008f1.pdf [file d0ra00008f1.pdf]

## Supporting information

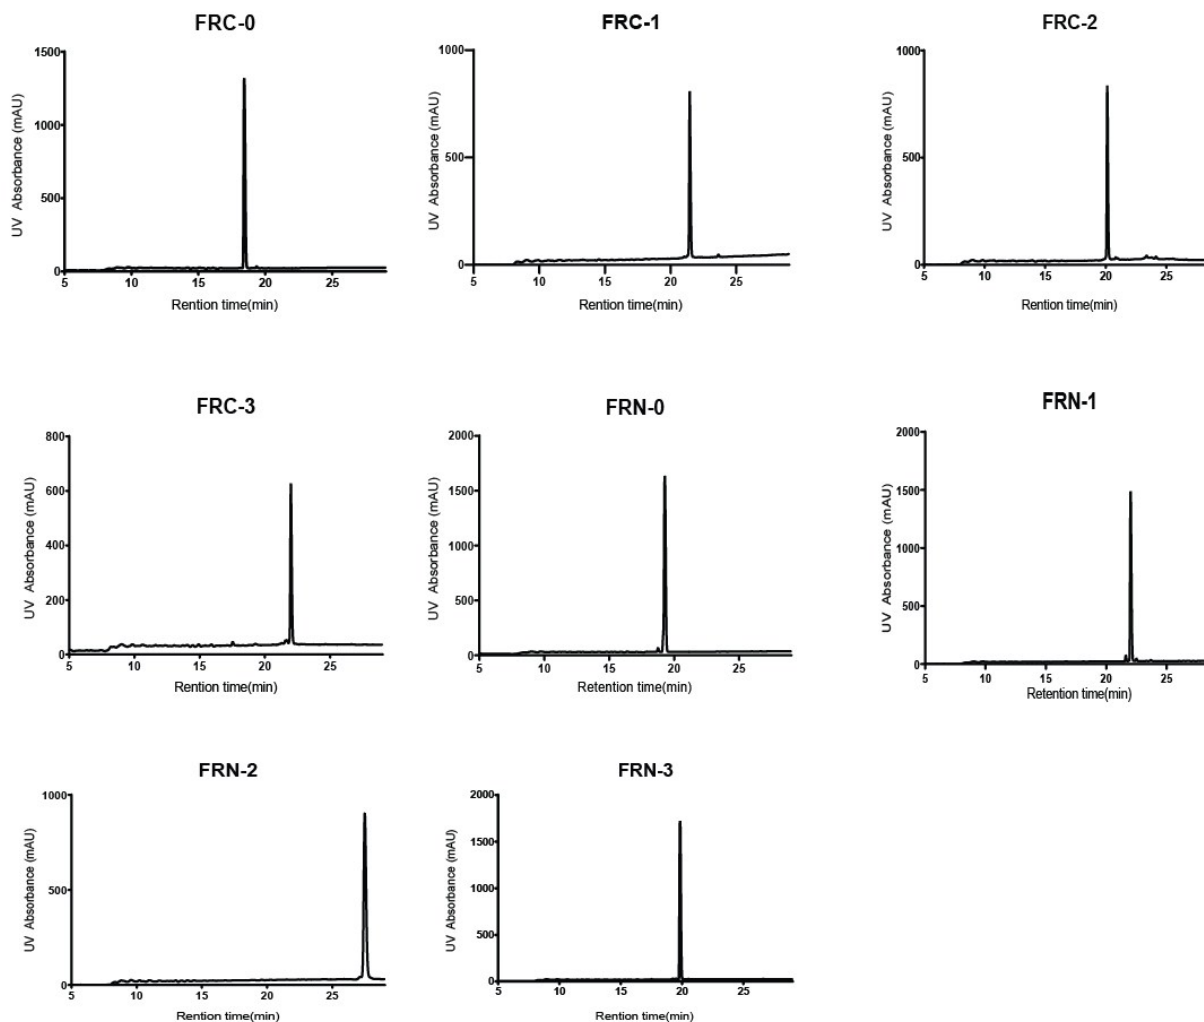

**Figure S1** HPLC chromatograms spectra of linear and stapled peptides. All peptides was analyzed by HPLC at gradients, 5-65 % B over 25 min (A= water, B = acetonitrile).

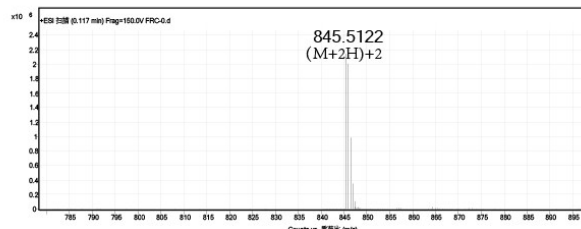

FRC-0

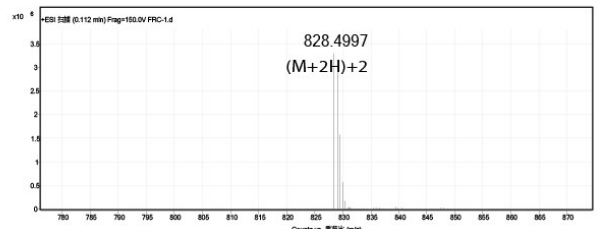

FRC-1

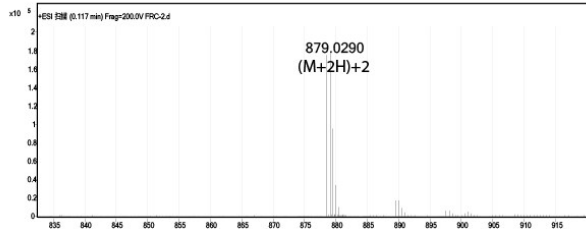

FRC-2

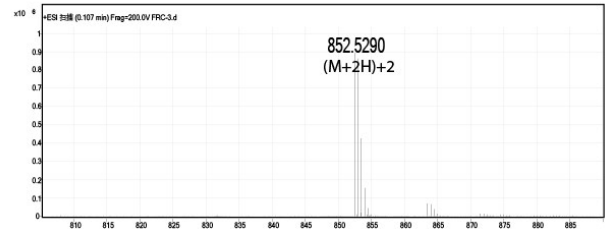

FRC-3

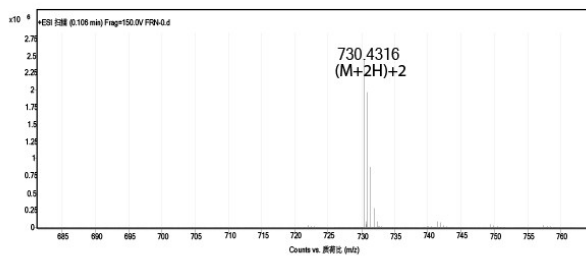

FRN-0

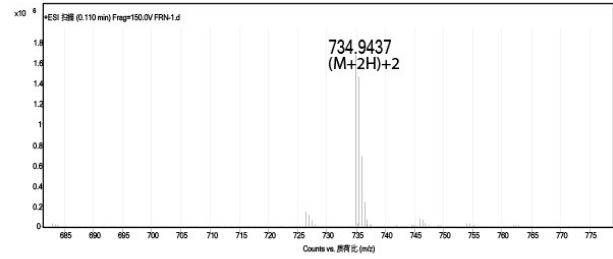

FRN-1

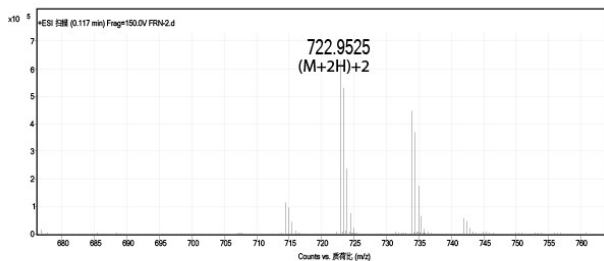

FRN-2

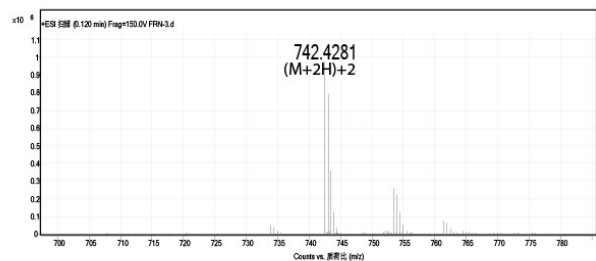

FRN-3

Figure S2 High resolution mass spectrometry of linear and stapled peptides

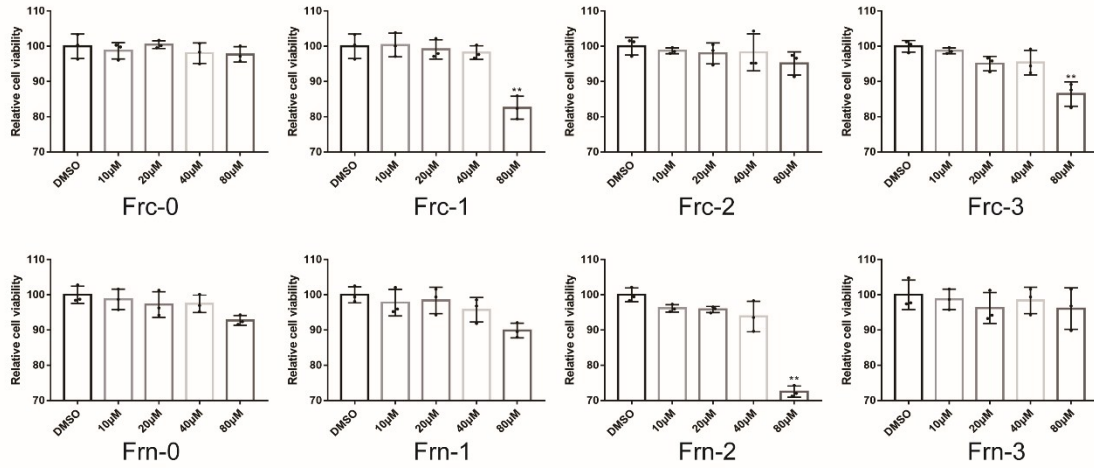

**Figure S3** Cytoactive of peptides -treated BMMs tested by CCK-8 assays at 96 hours. (Bars represent the standard error of the mean)
